# Supplementary material
Source: PubMed Central journal article supplement (PMC7196640)
Supplement: supp_RA120.012791_158420_1_supp_493080_q77257.pdf [file supp_RA120.012791_158420_1_supp_493080_q77257.pdf]

## Supplementary Figures

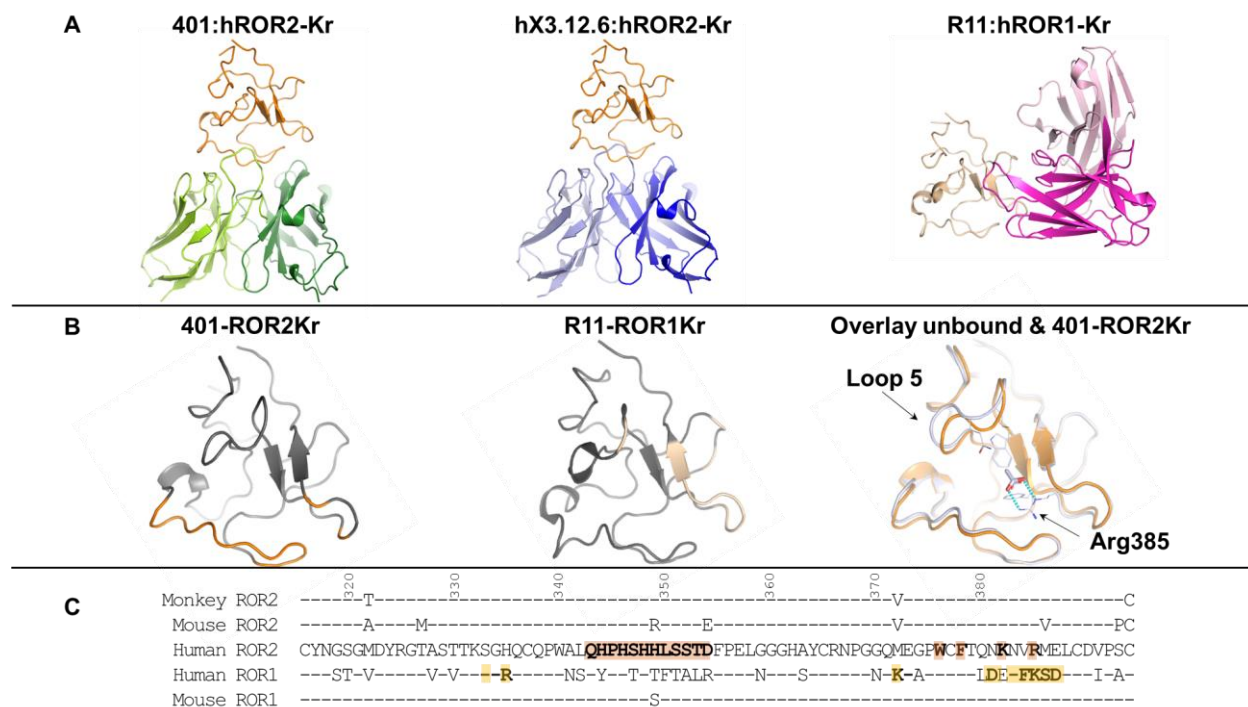

**Suppl. Fig. 1. Comparison of 401:hROR2-Kr, hX3.12.6:hROR2-Kr, and R11:hROR1-Kr crystal structures, epitopes, and kringle domains.** (A) Visual depiction where epitopes can be compared between the anti-ROR2 and anti-ROR1 mAbs. Darker and lighter shades denote V<sub>H</sub> and V<sub>L</sub> domains, respectively. The ROR2 and ROR1 kringle domains are shown in darker and lighter shades of orange, respectively. The overall rmsd of C $\alpha$  positions between the 401:hROR2-Kr and hX3.12.6:hROR2-Kr complexes was found to be 0.474 Å. (B) Comparison of co-crystallized kringle domains of ROR2 and ROR1 from left to right: Crystal structure of hROR2-Kr based on the crystallized 401:hROR2-Kr complex. The epitope of 401 is marked in dark orange. Crystal structure of hROR1-Kr based on the crystallized R11:hROR1-Kr complex. The epitope of R11 is marked in light shaded orange. Overlay of unbound hROR2-Kr (gray) and hROR2-Kr from the 401:hROR2-Kr complex (orange). The rmsd of C $\alpha$  positions was 0.383 Å. An acetate ion is bound to Arg385 of unbound hROR2-Kr through mixed salt bridge/hydrogen bond interactions. (C) Alignment of mouse, human, and monkey ROR2 and ROR1 kringle domain amino acid sequences (numbering from uniprot.org for hROR2). Residues that comprise the epitopes of 401 and R11 are marked in dark and light shaded orange, respectively. hROR2-Kr epitope residues which are not listed in Table I interact with 401 and hX3.12.6 through van der Waals interactions.

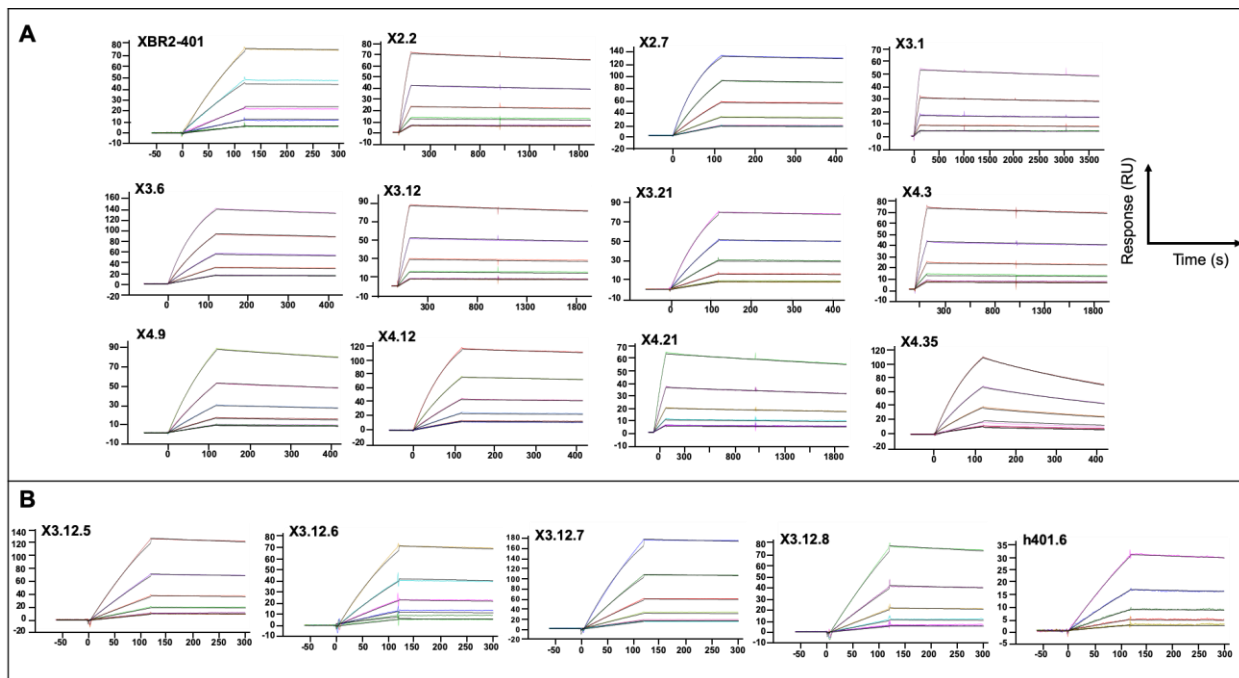

**Suppl. Fig. 2. Analysis of affinity matured and humanized mAbs by SPR.** (A) Shown are Biacore X100 sensorgrams of the top 12 chimeric rabbit/human anti-human ROR2 Fabs selected from the focused mutagenesis library by phage display. (B) Shown are Biacore X100 sensorgrams of the humanized anti-human ROR2 Fabs. A CM5 chip immobilized with a mouse anti-human Fc $\gamma$  mAb was used to capture Fc-hROR2. Fabs were injected at five different concentrations (200, 100, 50, 25, and 12.5 nM for chimeric Fabs and starting at 100 nM for humanized Fabs). Kinetic ( $k_{on}$  and  $k_{off}$ ) and thermodynamic ( $K_D = k_{off}/k_{on}$ ) parameters of 1:1 binding were calculated and compiled in **Table III** and **IV**.



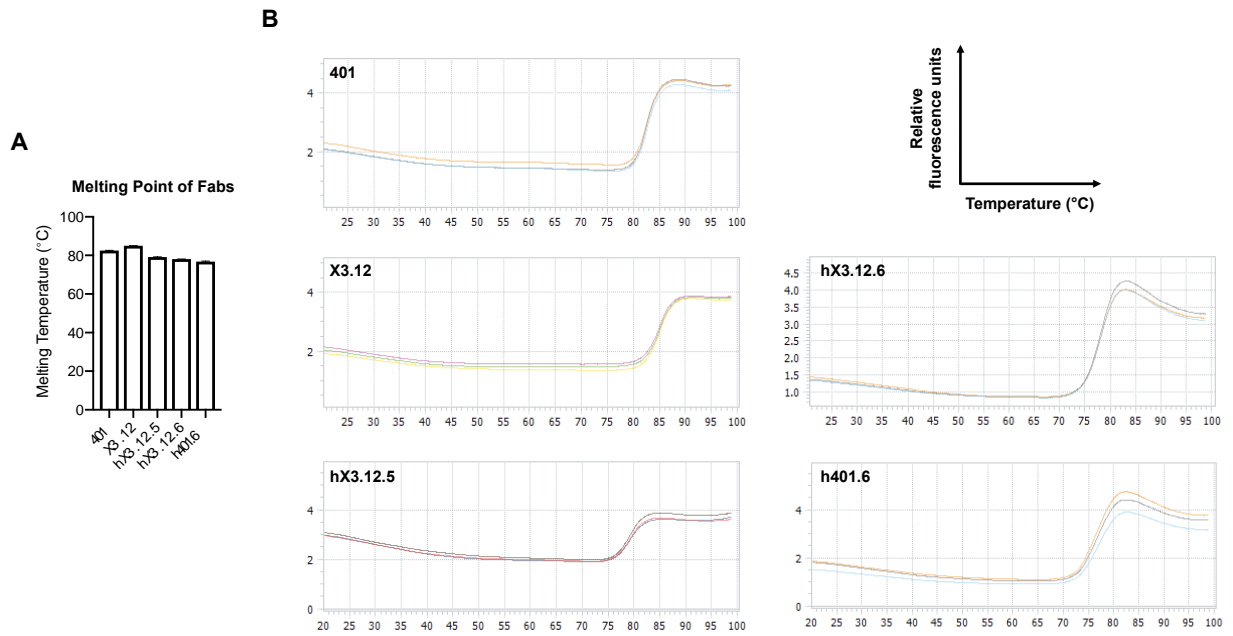

**Suppl. Fig. 4. Melting temperature and curves of parental and humanized Fabs.** (A) Melting temperature of the indicated Fabs. Error bars represent standard deviations of the average of triplicates (mean  $\pm$  SD) (B) Melting temperatures were determined using a LightCycler 480 protein melting protocol. Curves of triplicates of each Fab are shown. Melting of Fabs was measured up to 99°C.

**Suppl. Table I: Crystal structure data collection**

| Protein (PDB ID)                                                                                                           | 401:hROR2-Kr<br>(6OSH)                         | hX3.12.6:hROR2-Kr<br>(6OSV)                    | hROR2-Kr<br>(6OSN)                             |
|----------------------------------------------------------------------------------------------------------------------------|------------------------------------------------|------------------------------------------------|------------------------------------------------|
| Beam line                                                                                                                  | LS-CAT 21-ID-F                                 | ALS 5.0.2                                      | ALS 5.0.2                                      |
| Wavelength (Å)                                                                                                             | 0.9787                                         | 1.00                                           | 0.9787                                         |
| Space group                                                                                                                | P 2 <sub>1</sub> 2 <sub>1</sub> 2 <sub>1</sub> | P 2 <sub>1</sub> 2 <sub>1</sub> 2 <sub>1</sub> | P 2 <sub>1</sub> 2 <sub>1</sub> 2 <sub>1</sub> |
| Cell dimensions a, b, c (Å)                                                                                                | 45.2, 67.2, 89.6                               | 46.1, 60.1, 102.8                              | 33.6, 41.9, 52.2                               |
| Asymmetric unit                                                                                                            | 1 complex                                      | 1 complex                                      | 1 molecule                                     |
| Resolution (Å) <sup>1</sup>                                                                                                | 53.76 - 1.2<br>(1.236 - 1.201)                 | 51.4 - 1.4<br>(1.44 - 1.4)                     | 22.1 - 1.1<br>(1.12 - 1.08)                    |
| Total reflections <sup>1</sup>                                                                                             | 389303 (9481)                                  | 321703 (9887)                                  | 89198 (3544)                                   |
| Unique reflections <sup>1</sup>                                                                                            | 77000 (3850)                                   | 53044 (2652)                                   | 27454 (1821)                                   |
| Mean I/σI <sup>1</sup>                                                                                                     | 18.5 (1.9)                                     | 23.6 (1.5)                                     | 37.6 (10.8)                                    |
| Completeness (%) <sup>1</sup>                                                                                              | 92.4 (72.5)                                    | 94.6 (65.3)                                    | 85.8 (58.1)                                    |
| Multiplicity <sup>1</sup>                                                                                                  | 5.1 (2.5)                                      | 6.1 (3.7)                                      | 3.2 (1.9)                                      |
| R <sub>merge</sub> <sup>1</sup>                                                                                            | 0.044 (0.518)                                  | 0.032 (0.575)                                  | 0.021 (0.059)                                  |
| R <sub>pim</sub> <sup>1</sup>                                                                                              | 0.021 (0.372)                                  | 0.014 (0.317)                                  | 0.013 (0.510)                                  |
| CC1/2 <sup>1</sup>                                                                                                         | 0.99 (0.70)                                    | 1.00 (0.73)                                    | 1.00 (0.99)                                    |
| Wilson B-factor                                                                                                            | 10.0                                           | 19.2                                           | 5.8                                            |
| <b>Refinement</b>                                                                                                          |                                                |                                                |                                                |
| Resolution (Å) <sup>1</sup>                                                                                                | 40.4 - 1.2<br>(1.25 - 1.2)                     | 51.4 - 1.4<br>(1.46 - 1.4)                     | 22.1 - 1.1<br>(1.12 - 1.08)                    |
| No. of reflections <sup>1</sup>                                                                                            | 76670 (6172)                                   | 53563 (4565)                                   | 27453 (1821)                                   |
| No. of reflections in R <sub>free</sub> <sup>1,2</sup>                                                                     | 1150 (94)                                      | 1072 (94)                                      | 1367 (81)                                      |
| R <sub>work</sub> <sup>1</sup>                                                                                             | 0.160 (0.234)                                  | 0.162 (0.231)                                  | 0.154 (0.174)                                  |
| R <sub>free</sub> <sup>1,2</sup>                                                                                           | 0.169 (0.234)                                  | 0.188 (0.242)                                  | 0.162 (0.179)                                  |
| R.m.s. Bond length (Å)                                                                                                     | 0.008                                          | 0.009                                          | 0.009                                          |
| R.m.s. Bond angle (°)                                                                                                      | 0.98                                           | 1.05                                           | 1.26                                           |
| B-factor, average (Å <sup>2</sup> )                                                                                        | 17.1                                           | 30.7                                           | 11.5                                           |
| B-factor, ScFv (Å <sup>2</sup> )                                                                                           | 16.05                                          | 28.50                                          | -                                              |
| B-factor, ROR2-Kr (Å <sup>2</sup> )                                                                                        | 19.20                                          | 35.6                                           | 7.99                                           |
| B-factor, Water (Å <sup>2</sup> )                                                                                          | 29.31                                          | 37.52                                          | 25.57                                          |
| <b>Number of atoms</b>                                                                                                     |                                                |                                                |                                                |
| Protein                                                                                                                    | 2386                                           | 2383                                           | 666                                            |
| Water                                                                                                                      | 426                                            | 340                                            | 165                                            |
| <b>Model quality (%)</b>                                                                                                   |                                                |                                                |                                                |
| Ramachandran favored                                                                                                       | 96.3                                           | 97.7                                           | 96.4                                           |
| Ramachandran allowed                                                                                                       | 3.4                                            | 2.3                                            | 3.6                                            |
| Ramachandran outliers                                                                                                      | 0.3                                            | 0.0                                            | 0.0                                            |
| Rotamer outliers                                                                                                           | 0.0                                            | 0.0                                            | 0.0                                            |
| <sup>1</sup> Parentheses refer to statistics for the highest resolution shell.                                             |                                                |                                                |                                                |
| <sup>2</sup> R <sub>free</sub> is calculated with removal of 2 % of the reflections as the test set before the refinement. |                                                |                                                |                                                |
